# Supplementary material for: Quantitative chemical assay of nanogram-level particulate matter using aerosol mass spectrometry: characterization of particles collected from uncrewed atmospheric measurement platforms
Source: Copernicus journal article supplement (doi:10.5194/amt-16-955-2023), 2023-02-23
Supplement: Supplementary file 1 [file amt-16-955-2023-supplement.pdf]

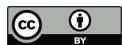

*Supplement of*

## **Quantitative chemical assay of nanogram-level particulate matter using aerosol mass spectrometry: characterization of particles collected from uncrewed atmospheric measurement platforms**

**Christopher R. Niedeck et al.**

*Correspondence to:* Qi Zhang ([dkwzhang@ucdavis.edu](mailto:dkwzhang@ucdavis.edu))

The copyright of individual parts of the supplement might differ from the article licence.

Table S1. Sampling information for all UAS samples.

| Sample name | Collection media | Ground or air        | Sampling time, start | Sampling time, end  | PM collection duration (hr) | Total air vol. sampled (m <sup>3</sup> ) |
|-------------|------------------|----------------------|----------------------|---------------------|-----------------------------|------------------------------------------|
| PNNL_F1     | Filter           | Ground               | 12/06/2021<br>19:30  | 12/06/2021<br>22:30 | 3                           | 0.45                                     |
| PNNL_F2     | Filter           | Ground               | 12/06/2021<br>22:30  | 12/07/2021<br>01:30 | 3                           | 0.45                                     |
| PNNL_F3     | Filter           | Ground               | 12/07/2021<br>01:30  | 12/07/2021<br>04:30 | 3                           | 0.45                                     |
| PNNL_F4     | Filter           | Ground               | 12/07/2021<br>04:30  | 12/07/2021<br>07:30 | 3                           | 0.45                                     |
| PNNL_F5     | Filter           | Ground               | 12/07/2021<br>07:30  | 12/07/2021<br>10:30 | 3                           | 0.45                                     |
| PNNL_F6     | Filter           | Ground               | 12/07/2021<br>10:30  | 12/07/2021<br>13:30 | 3                           | 0.45                                     |
| PNNL_F7     | Filter           | Ground               | 12/07/2021<br>13:30  | 12/07/2021<br>16:30 | 3                           | 0.45                                     |
| PNNL_F8     | Filter           | Ground               | 12/07/2021<br>16:30  | 12/07/2021<br>19:30 | 3                           | 0.45                                     |
| PNNL_I1     | Impactor         | Ground               | 12/06/2021<br>19:30  | 12/07/2021<br>14:30 | 19                          | 0.342                                    |
| PNNL_I2     | Impactor         | Ground               | 12/07/2021<br>14:30  | 12/07/2021<br>16:30 | 2                           | 0.036                                    |
| PNNL_I3     | Impactor         | Ground               | 12/07/2021<br>16:30  | 12/07/2021<br>19:30 | 3                           | 0.054                                    |
| SGP_I1      | Impactor         | Ground               | 11/15/2021<br>16:40  | 11/16/2021<br>16:26 | 24                          | 0.432                                    |
| SGP_I2      | Impactor         | Ground               | 11/16/2021<br>16:54  | 11/17/2021<br>14:18 | 23.7                        | 0.426                                    |
| SGP_I3      | Impactor         | Ground               | 11/17/2021<br>14:46  | 11/18/2021<br>14:32 | 24                          | 0.432                                    |
| SGP_F1      | Filter           | Multiple UAV flights | 11/08/2021<br>13:32  | 11/16/2021<br>10:00 | 15.38                       | 2.31                                     |

Table S2. HR-AMS fragmentation table used in this study. Unique differences related to the use of  $^{34}\text{SO}_4$  can be found in the “HR\_frag\_sulphate\_34” column.

| HR_specMass<br>Algebra | HR_frag_sulphate                                                                                                        | HR_frag_sulphate_34                                                  | HR_frag_organic                     |
|------------------------|-------------------------------------------------------------------------------------------------------------------------|----------------------------------------------------------------------|-------------------------------------|
| C                      |                                                                                                                         |                                                                      | {C},-HR_frag_blackcarbon[{C}]       |
| j13C                   |                                                                                                                         |                                                                      | 0.0108157*HR_frag_organic[{C}]      |
| N                      |                                                                                                                         |                                                                      |                                     |
| j15N                   |                                                                                                                         |                                                                      |                                     |
| O                      | 0.04*HR_frag_sulphate[{H2O}]                                                                                            | 0.04*HR_frag_sulphate_34[{H2O}]                                      | 0.04*HR_frag_organic[{H2O}]         |
| HO                     | 0.25*HR_frag_sulphate[{H2O}]                                                                                            | 0.25*HR_frag_sulphate_34[{H2O}]                                      | 0.25*HR_frag_organic[{H2O}]         |
| j18O                   | 0.00205499*HR_frag_sulphate[{O}]                                                                                        | 0.00205499*HR_frag_sulphate_34[{O}]                                  | 0.00205499*HR_frag_organic[{O}]     |
| H2O                    | 0.67*HR_frag_sulphate[{SO2}],0.67*HR_frag_sulphate[{SO}]                                                                | 0.67*HR_frag_sulphate_34[{j34SO2}],0.67*HR_frag_sulphate_34[{j34SO}] | 1*HR_frag_organic[{CO2}]            |
| Hj18O                  | 0.00205499*HR_frag_sulphate[{HO}]                                                                                       | 0.00205499*HR_frag_sulphate_34[{HO}]                                 | 0.00205499*HR_frag_organic[{HO}]    |
| H2j18O                 | 0.00205499*HR_frag_sulphate[{H2O}]                                                                                      | 0.00205499*HR_frag_sulphate_34[{H2O}]                                | 0.00205499*HR_frag_organic[{H2O}]   |
| CO2plus2               |                                                                                                                         |                                                                      | {CO2plus2}                          |
| CO                     |                                                                                                                         |                                                                      | {CO2}                               |
| j13CO                  |                                                                                                                         |                                                                      | 0.0108157*HR_frag_organic[{CO}]     |
| Cj18O                  |                                                                                                                         |                                                                      | 0.00205499*HR_frag_organic[{CO}]    |
| S                      | 0.21*HR_frag_sulphate[{SO2}],0.21*HR_frag_sulphate[{SO}],0.068*HR_frag_sulphate[{HSO3}],0.068*HR_frag_sulphate[{H2SO4}] |                                                                      |                                     |
| j33S                   | 0.00789557*HR_frag_sulphate[{S}]                                                                                        |                                                                      |                                     |
| j34S                   | 0.0447416*HR_frag_sulphate[{S}]                                                                                         | {j34S}                                                               |                                     |
| CO2                    |                                                                                                                         |                                                                      | {CO2}                               |
| j13CO2                 |                                                                                                                         |                                                                      | 0.0108157*HR_frag_organic[{CO2}]    |
| Cj18OO                 |                                                                                                                         |                                                                      | 0.0041099871*HR_frag_organic[{CO2}] |

Table S3. Analytical parameters for the MN-AMS, derived from the analysis of standard mixtures. Reported nebulization efficiency is for a solution containing 3 mg L<sup>-1</sup> of each of the listed components and syringe pump flow rate of 52 μL min<sup>-1</sup>. “Required sampling time” gives an estimate of the sampling time needed to reach the limit of quantification (10\*standard deviation), based on an average ambient PM concentration of 10 μg m<sup>-3</sup> and a sampler flow rate of 2.5 L min<sup>-1</sup>.

| Component       | Nebulization efficiency (%) | Detection limit (ng) | HR-AMS recovery (%) | Required sampling time (hr) |
|-----------------|-----------------------------|----------------------|---------------------|-----------------------------|
| Organics        | 0.93                        | 2.2                  | 94.0                | 0.166                       |
| SO <sub>4</sub> | 1.2                         | 0.19                 | 104                 | 0.01                        |
| NO <sub>3</sub> | 0.78                        | 0.75                 | 87.1                | 0.074                       |

10

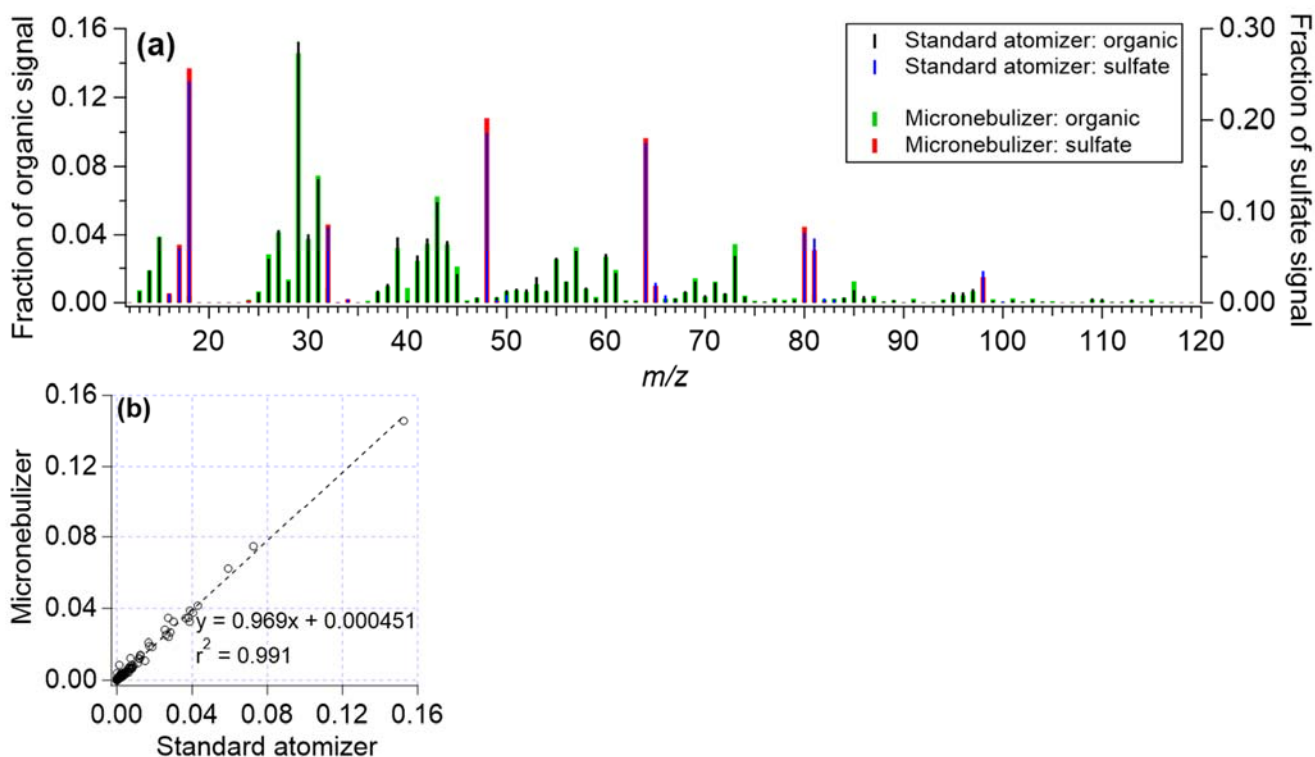

15

Figure S1. Comparison between organic and inorganic data derived from a standard Collision-type atomizer and the MN-AMS system. a) Organic and sulfate mass spectra derived from atomizing a solution of sucrose and ammonium sulfate. b) The strong correlation ( $r^2 = 0.99$ ) between the systems indicates the micronebulizer and standard atomizer behave similarly with no clear artifacts introduced by the micronebulization procedure.

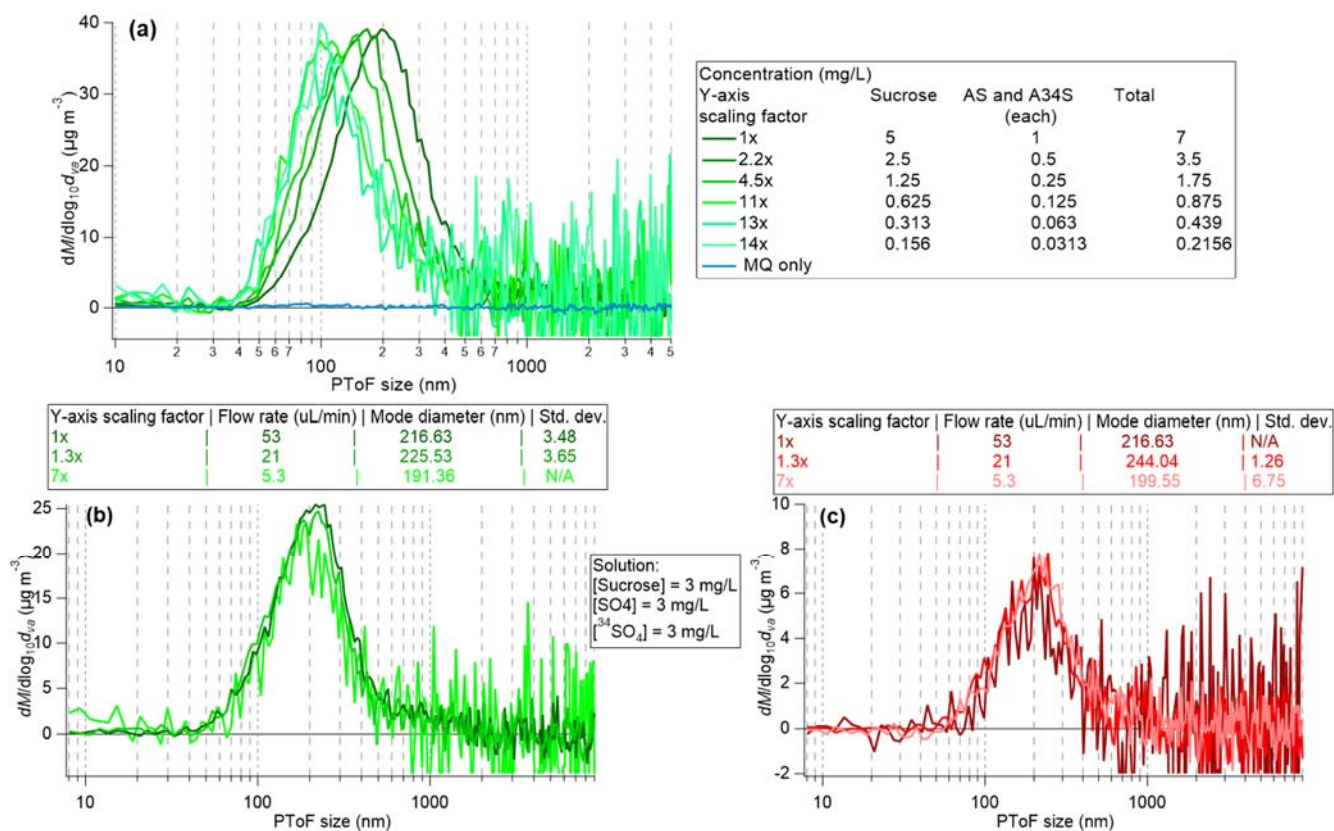

20 **Figure S2.** The HR-AMS measured particle size distribution is modified by the total solute concentration, but not by sample volume nebulized. a) The organic size distribution measured at decreasing total solute concentrations at a syringe pump flow rate of 53  $\mu\text{L}/\text{min}$ . The particle size distribution shifts to lower diameters as the total solute concentration decreases. b) The organic and c) sulfate size distributions measured using decreasing syringe pump flow rates. Lower flow rates lead to lower sampled mass, but the mode diameter is not significantly affected.

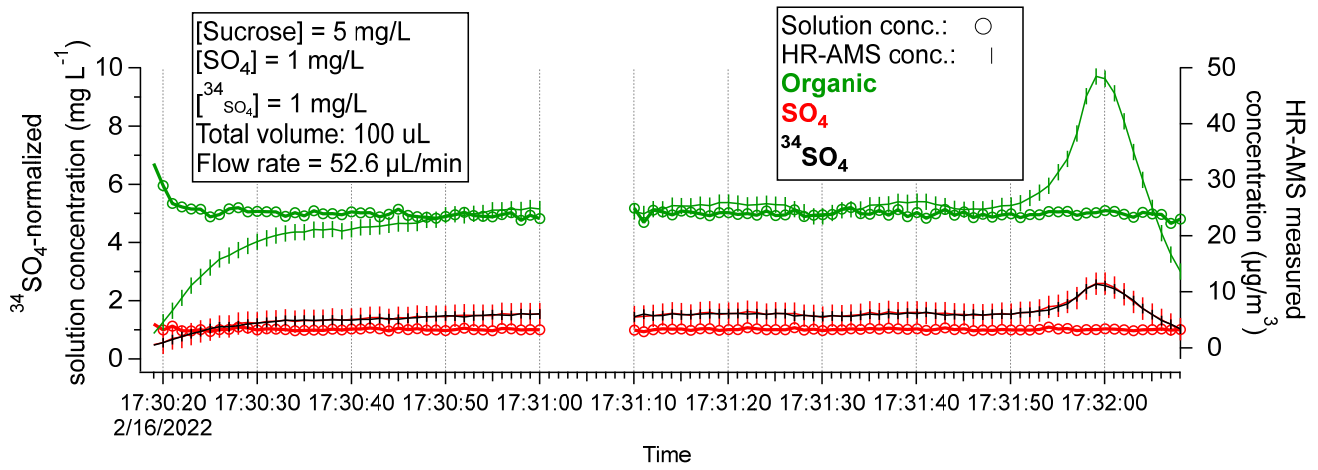

25 Figure S3. The HR-AMS-measured mass concentration of different component is highly reproducible using very low sample volumes (~53  $\mu\text{L}$ ) using the Fast-MS mode. The  $^{34}\text{SO}_4$ -normalized solution concentrations of organics and  $\text{SO}_4$  are well-correlated to the known solution concentrations of sucrose and  $\text{SO}_4$ .

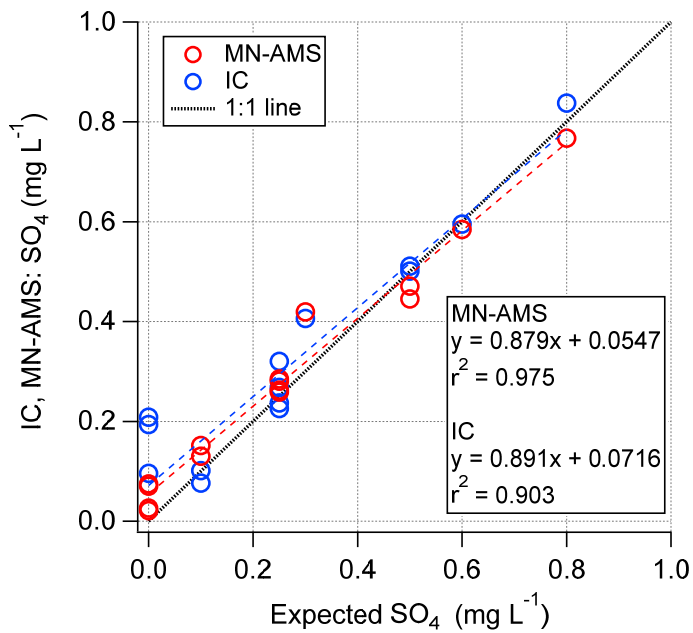

30 Figure S4. Comparison between the liquid concentration of  $\text{SO}_4$  measured by parallel IC and MN-AMS for a set of standard solutions. The standard solutions had  $\text{SO}_4$  and  $^{34}\text{SO}_4$  concentrations ranging from 0 – 0.8  $\text{mg L}^{-1}$ , with varying ratios of  $\text{SO}_4$ -to- $^{34}\text{SO}_4$ .

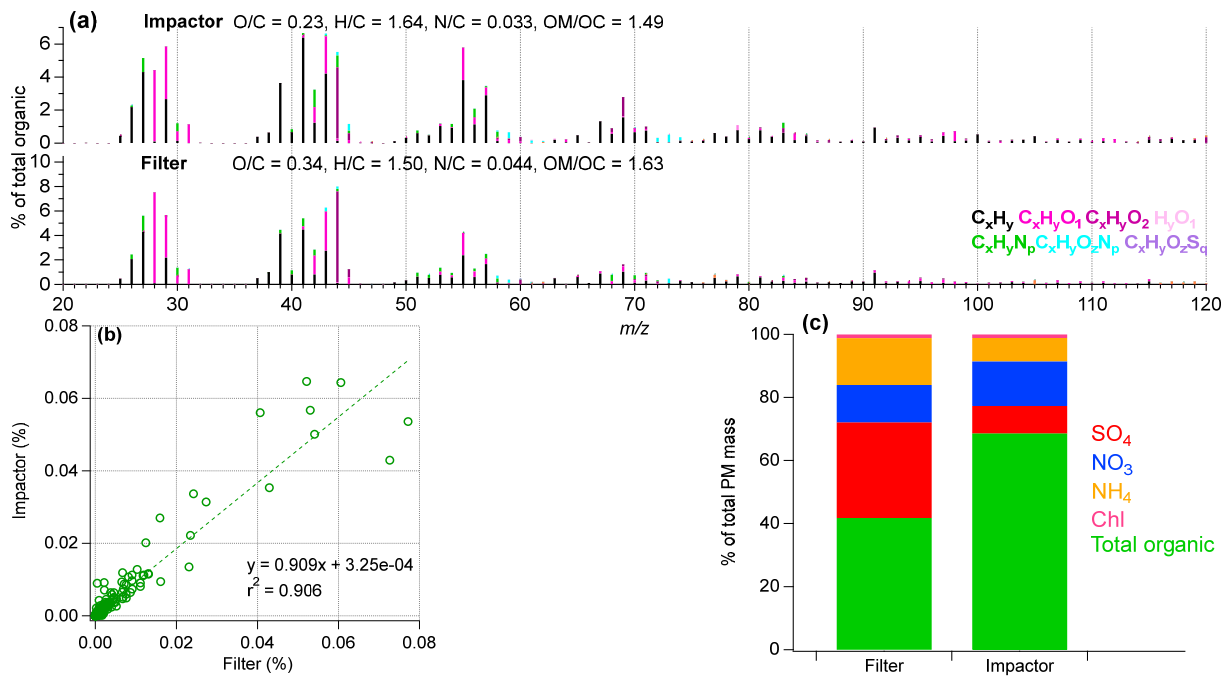

Figure S5. Comparisons of ambient PM<sub>2.5</sub> samples collected using a UxS filter sampler and a Water-CPC Impactor Sampler at PNNL during the same time period. a) Mass spectra of the filter and impactor, normalized by the total measured PM mass. b) Comparison between the organic mass spectra of the filter and impactor. c) Fraction contribution of the measured PM components in the filter and impactor sample.

35

40

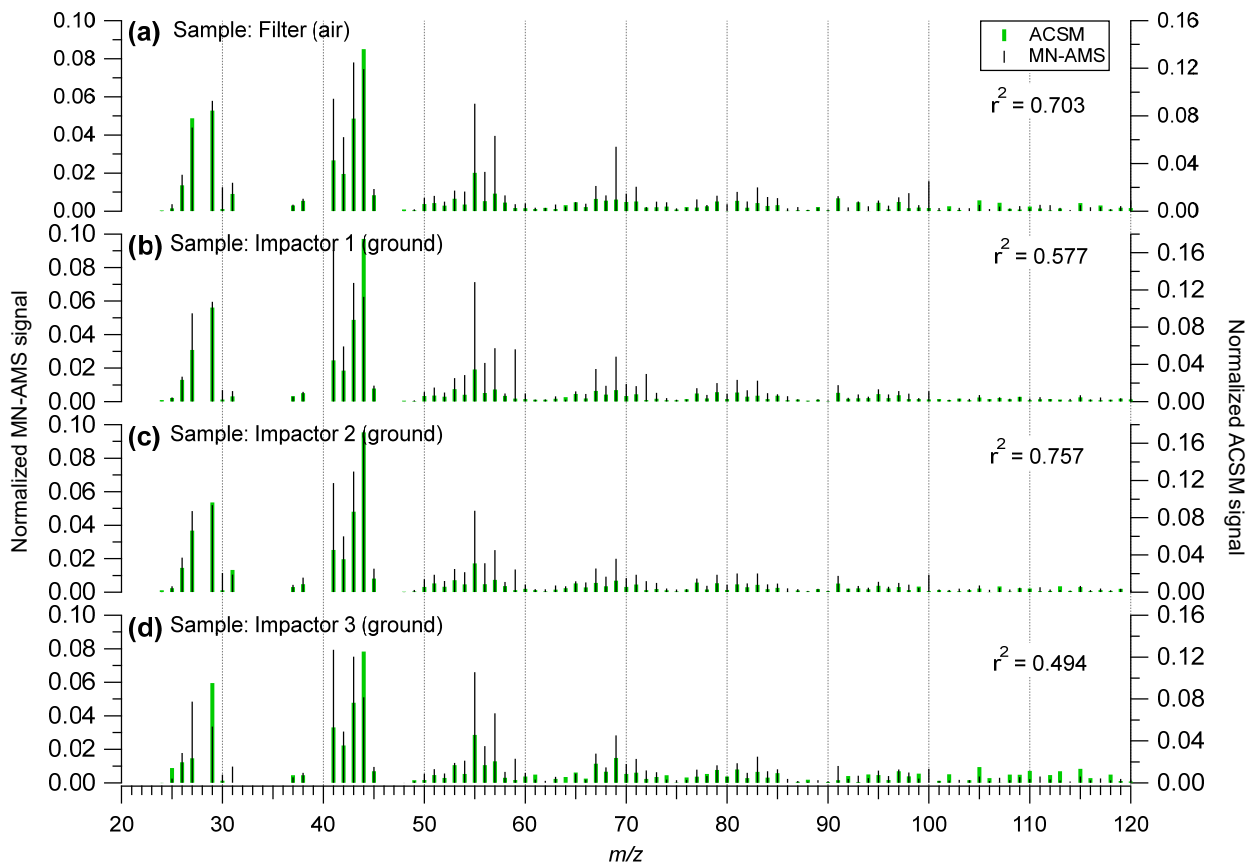

Figure S6. ACSM data for the filter and impactor sampling periods indicated in Fig. 5a. The ACSM data is the companion data for Figs. 5b-e., and were used to determine the  $r^2$  values shown here.



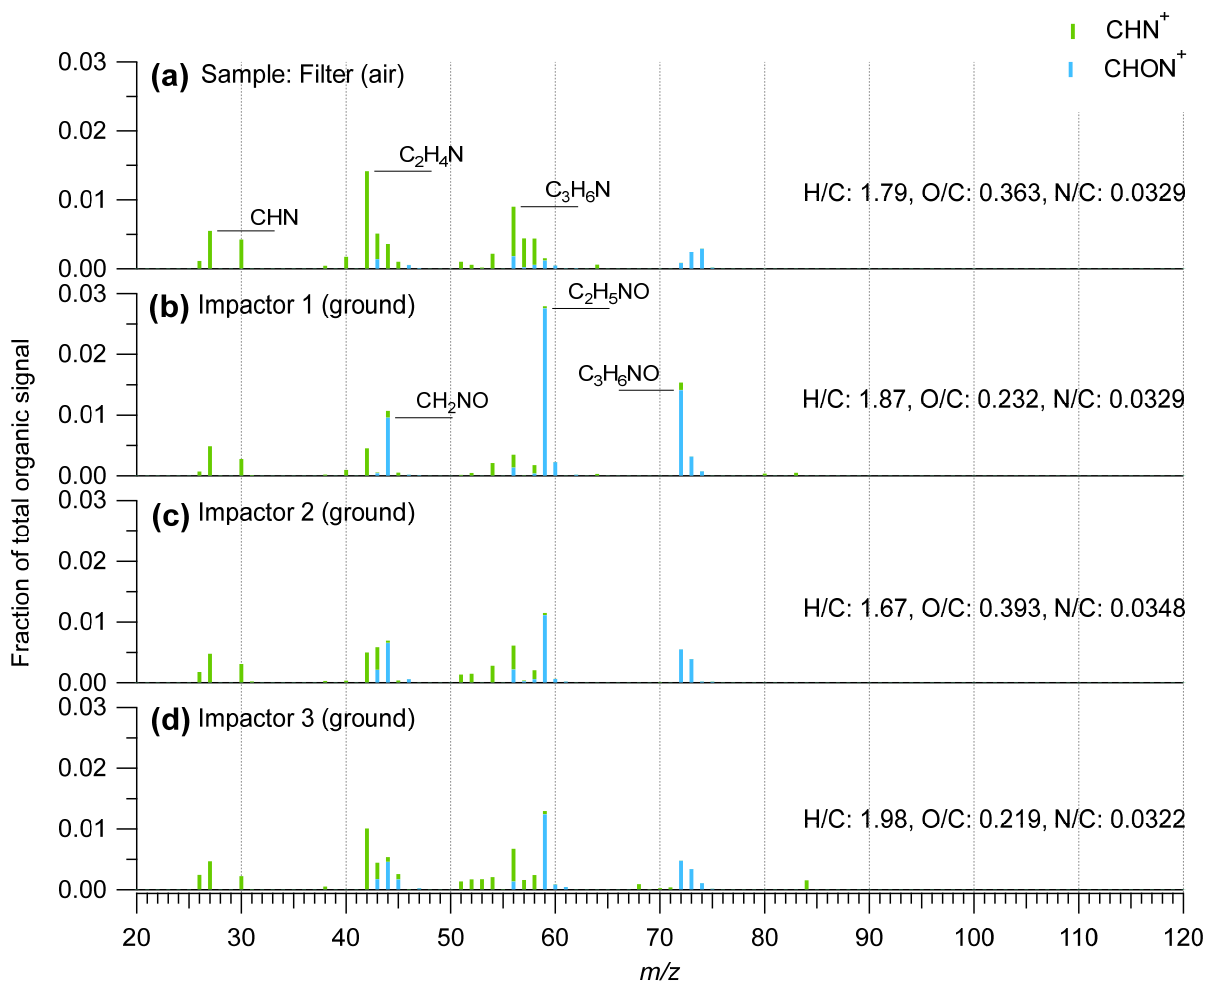

45 Figure S7. Recreation of Figs. 5 b-e showing only the  $\text{CHN}^+$  and  $\text{CHON}^+$  ions.

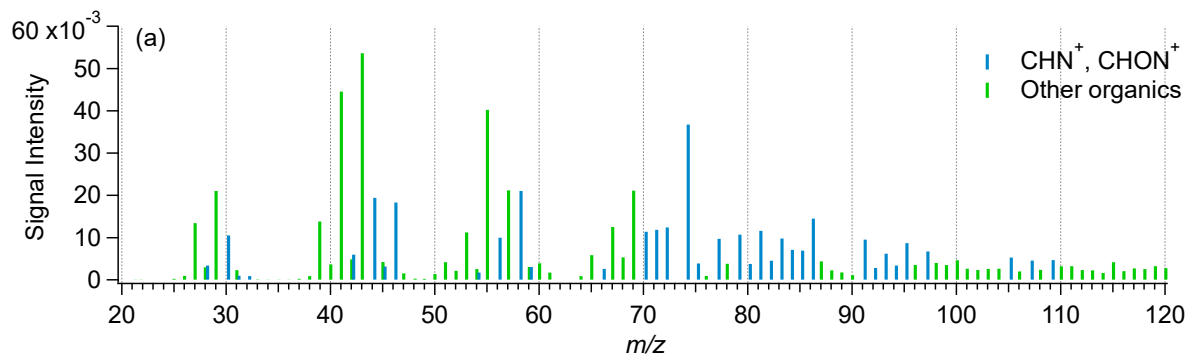

50

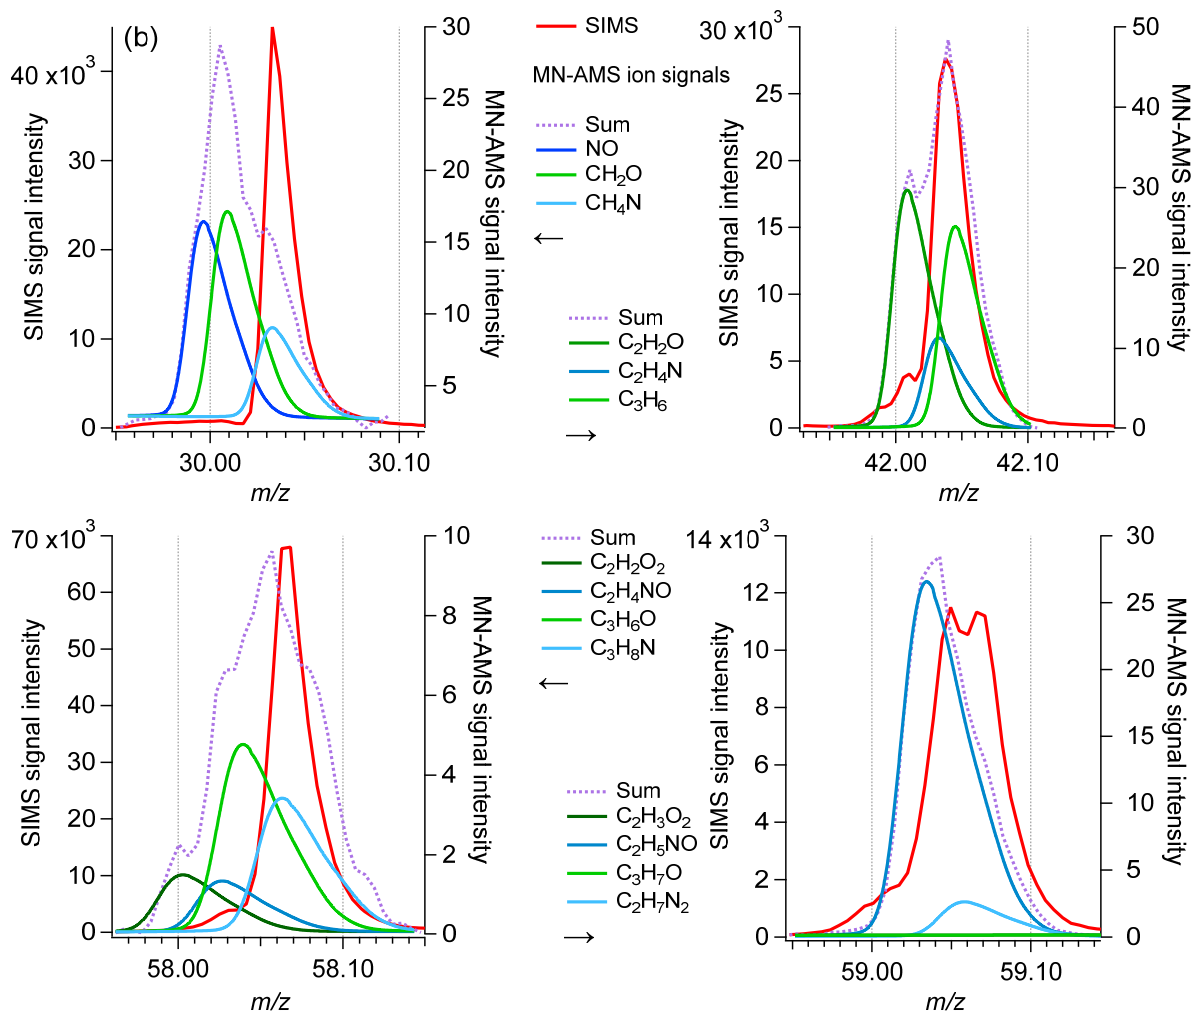

Figure S8. a) A typical ToF-SIMS unit mass resolution, positive ion spectrum of the SGP\_I1 sample.  $\text{CHN}^+$  and  $\text{CHON}^+$  ions are colored in blue, while all other organic species (e.g.  $\text{CH}^+$ ,  $\text{CHO}^+$ ) are in green.  $\text{CHN}^+$  and  $\text{CHON}^+$  ions are offset by  $0.2\text{ m/z}$  for clarity when there is overlap with other organic ions. b) A selection of  $m/z$  values and the high-resolution fittings for the SIMS and AMS.

55 **Note that the large differences in instrument sampling and ionization mechanisms precludes specific chemical comparisons. High-resolution fittings are shown to illustrate the similar abundance of nitrogen-containing organics detected by each instrument.**
